# Supplementary material
Source: Elsevier journal article supplement (https://www.sciencedirect.com/science/article/pii/S0187893X15000324)
Supplement: mmc1 [file S0187893X15000324:mmc1.docx]

**ANEXO**
